# Supplementary material for: Chronic lung infection by Pseudomonas aeruginosa biofilm is cured by L-Methionine in combination with antibiotic therapy
Source: PubMed Central journal article supplement (PMC4629202; doi:10.1038/srep16043), 2015-11-02
Supplement: srep16043-s1.pdf [file srep16043-s1.pdf]

## SUPPORTING INFORMATION

### **Title: Chronic lung infection by *Pseudomonas aeruginosa* biofilm is cured by L-Methionine in combination with antibiotic therapy**

Divya Prakash Gnanadhas<sup>1,2,†\*</sup>, Monalisha Elango<sup>1\*</sup>, Akshay Datey<sup>1,2,3</sup>, Dipshikha Chakravortty<sup>1,#</sup>

<sup>1</sup>Department of Microbiology and Cell Biology, Indian Institute of Science, Bangalore, India.

<sup>2</sup>Department of Aerospace Engineering, Indian Institute of Science, Bangalore, India.

\*Equal contribution

<sup>3</sup>The Bioengineering Program, Indian Institute of Science, Bangalore, India.

*# Corresponding author*

Dipshikha Chakravortty

E.mail: [dipa@mcb.iisc.ernet.in](mailto:dipa@mcb.iisc.ernet.in),

Telephone: +91 80 22932842, Fax: +91 80 23602697

<sup>†</sup> Present Address: Department of Pharmacology and Experimental Neuroscience, University of Nebraska Medical Center, Omaha, NE, USA.

Figure S1

a

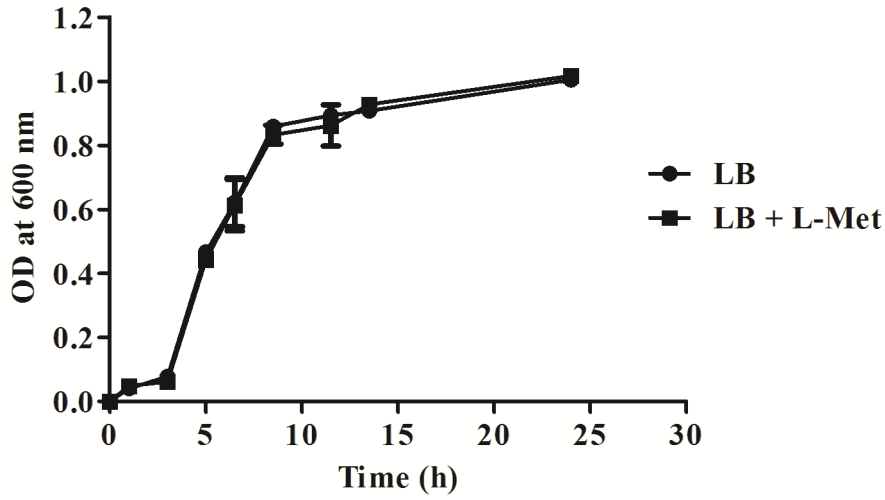

b

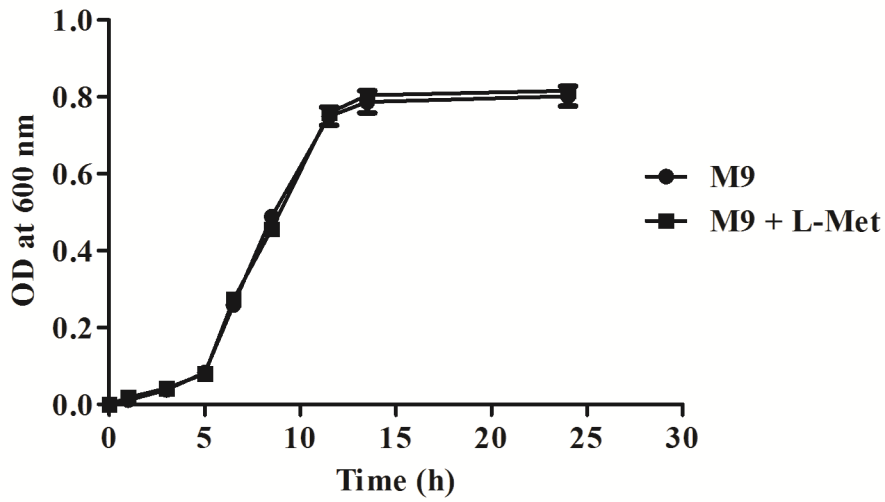

**Figure S1. Growth curve.**  $1 \times 10^4$  stationary phase PA were inoculated into 10 ml of (a) Luria broth without NaCl (b) M9 minimal media in the presence or absence of  $0.5 \mu\text{M}$  L-Met and kept at  $37^\circ\text{C}$  in shaking condition (180 rpm) and at different time points optical density was determined at 600 nm.

Figure S2

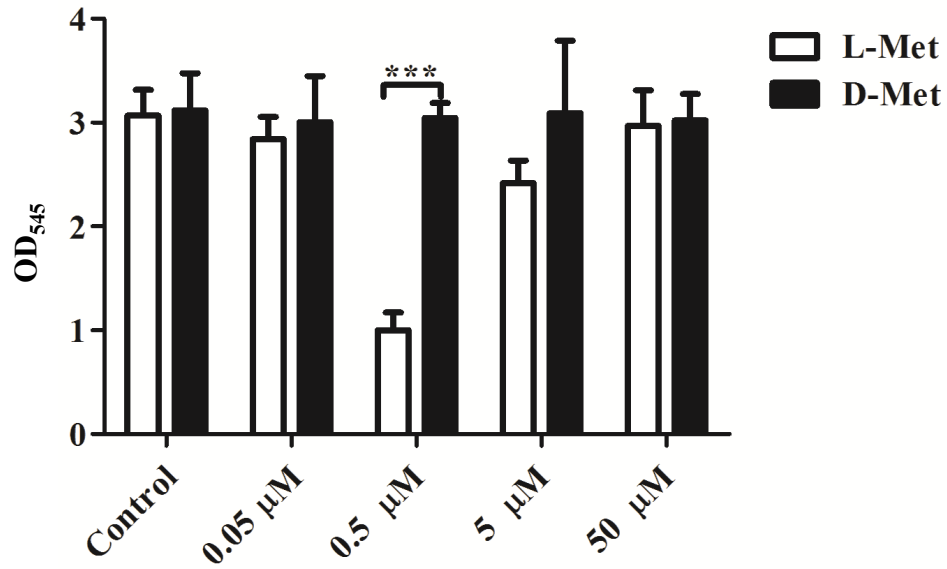

**Figure S2. Effect of D-Met on PA biofilm.** PA was incubated with different concentrations of L-Met or D-Met and at 72 h, the biomass was determined by crystal violet staining. . The Statistical significance was calculated using One-way ANOVA. Asterisks indicate statistical significance as follows: \*\*\* (p<0.001)

**Figure S3**

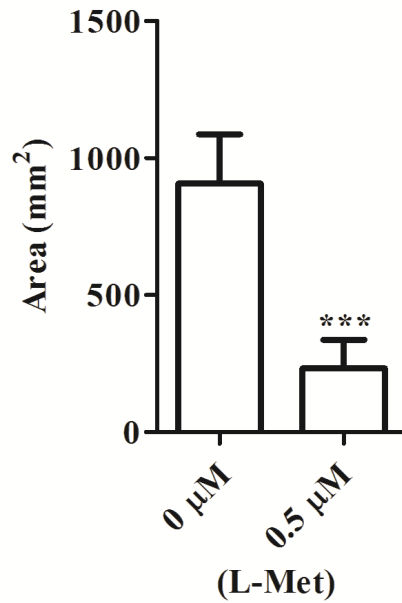

**Figure S3. L-Met inhibits *Pseudomonas aeruginosa* twitching motility.** Stationary PA was spotted on 1% LB agar plates with or without 0.5 μM L-Met and the plates were incubated at 37°C for 24 h. Areas of interstitial biofilms were measured and presented as the mean±SD from three independent experiments performed in triplicate. The Statistical significance was calculated using students' t test. Asterisks indicate statistical significance as follows: \*\*\* (p<0.001)

**Figure S4**

**a**

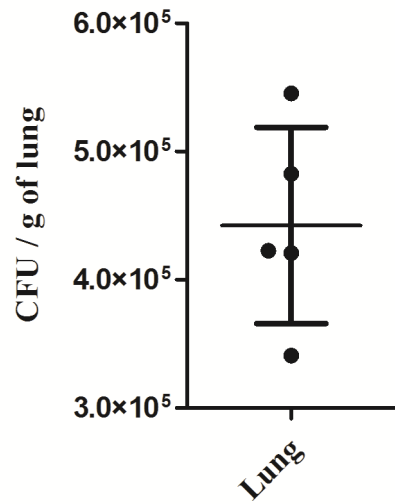

**b**

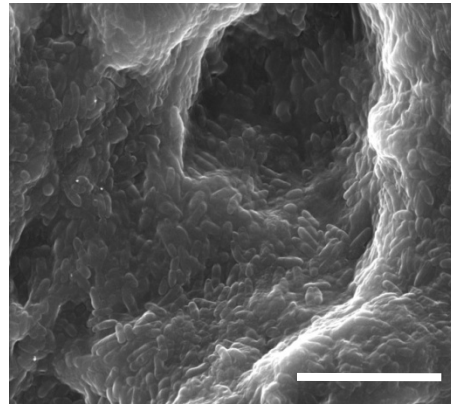

**Figure S4. Establishment of PA lung infection model.** BALB/c mice were infected with PA via the intranasal route for 3 days. **(a)** The mice were sacrificed and the lungs were removed, homogenized, and plated onto LB agar. **(b)** SEM images of infected lung containing PA biofilm. Scale bar: 10  $\mu$ m.

**Figure S5**

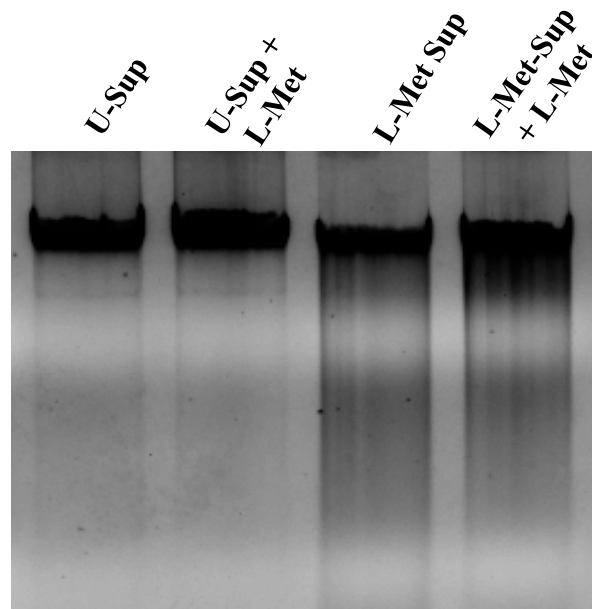

**Figure S5. Effect of L-met on DNase activity.** 100  $\mu$ l of 72 h old U-Sup or L-Met-Sup were incubated with L-Met (0.5  $\mu$ M) for 1h at 37°C and the samples were loaded in 1% agarose gel and visualized.
